# Supplementary material
Source: PubMed Central journal article supplement (PMC10020475)

## Supplementary Material

**Fig. S1. Principal Component Analysis of clinical and clinicopathological parameters does not segregate the three studied groups (YTE, Remission and Control).** The test included as parameters were complete blood count (CBC), serum biochemical profile, measurement of bile acids and basal cortisol concentrations, serum concentration of cTLI (canine trypsin-like- immunoreactivity), SpecPL (specific pancreatic lipase), and cobalamin. Additionally, urinalysis for urine protein creatinine ratio (UPC) and urinary sediments.

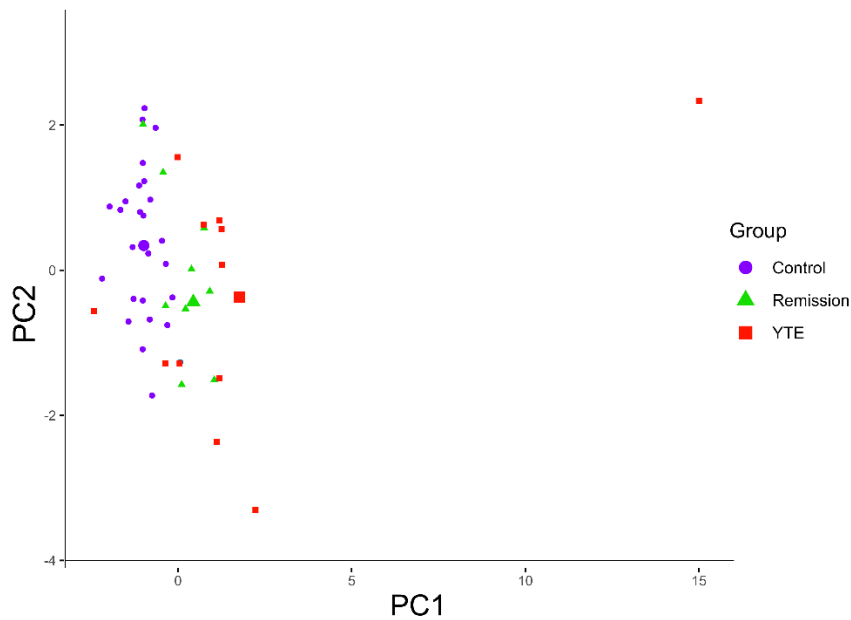

Supplement: 41598_2023_31024_MOESM1_ESM.pdf [file 41598_2023_31024_MOESM1_ESM.pdf]
