# Supplementary material
Source: PubMed Central journal article supplement (PMC10020475)
Supplement: 41598_2023_31024_MOESM2_ESM.pdf [file 41598_2023_31024_MOESM2_ESM.pdf]

**Fig. S2.** Analysis of the differentially abundant fraction expressed as numbers of reads of 16S rRNA gene for individual dogs and the taxonomic breakdown of the dominant ASVs across all samples.

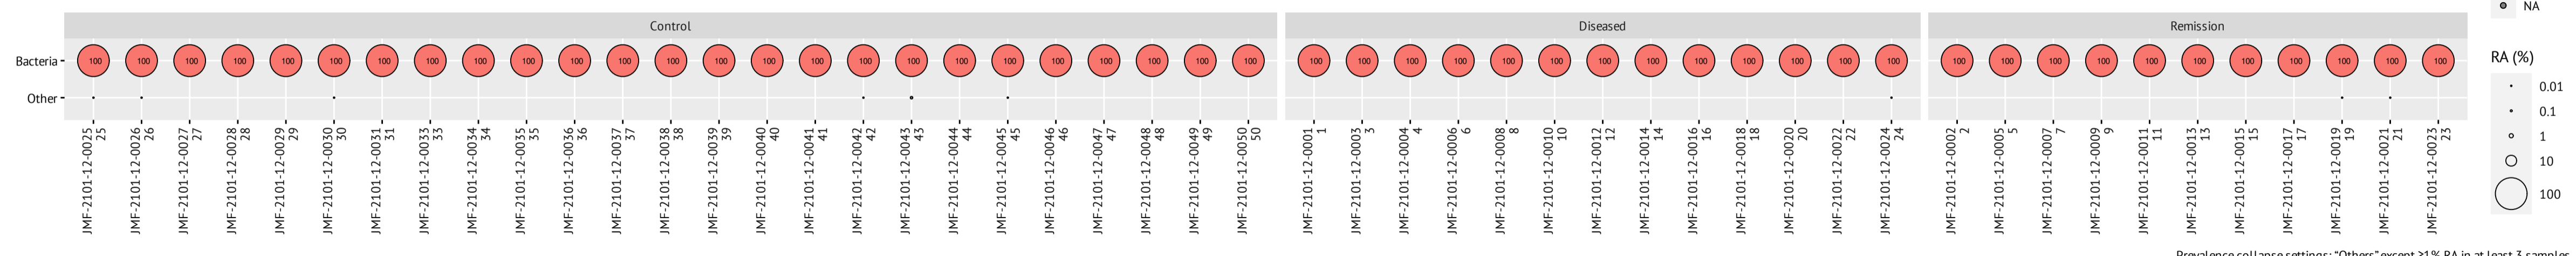

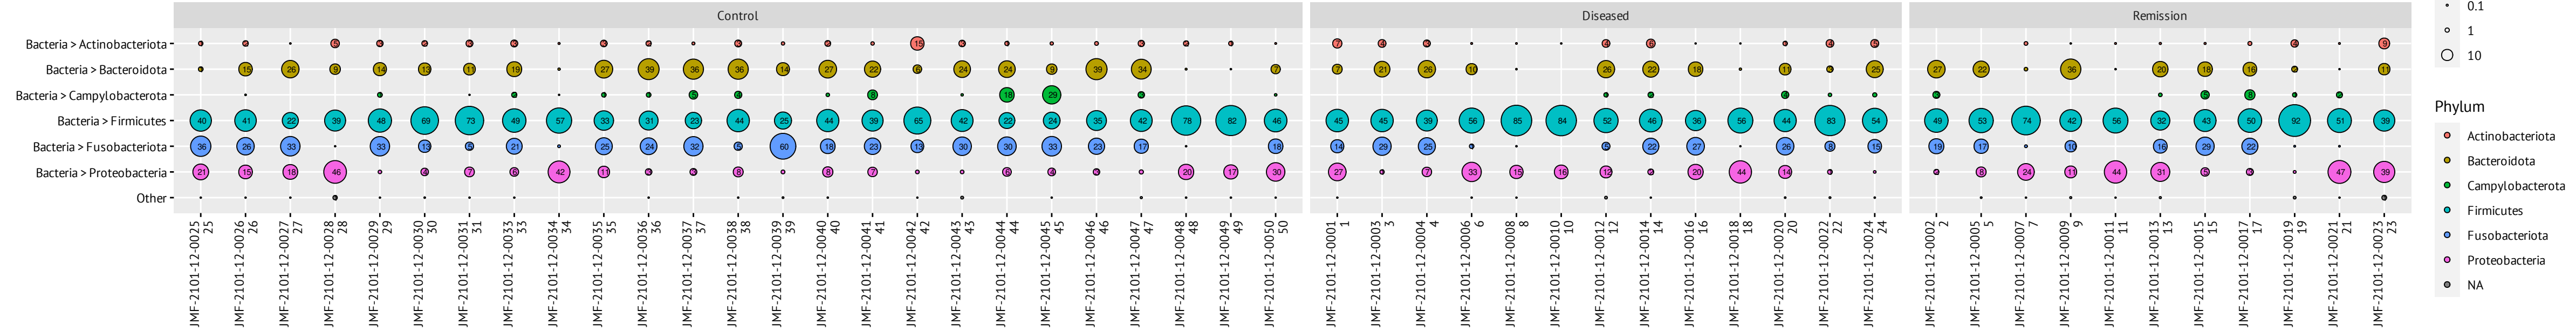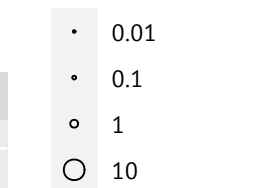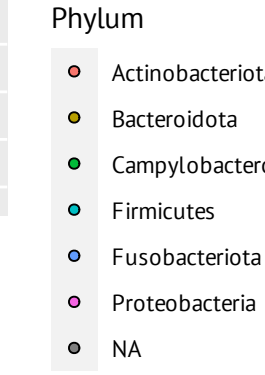

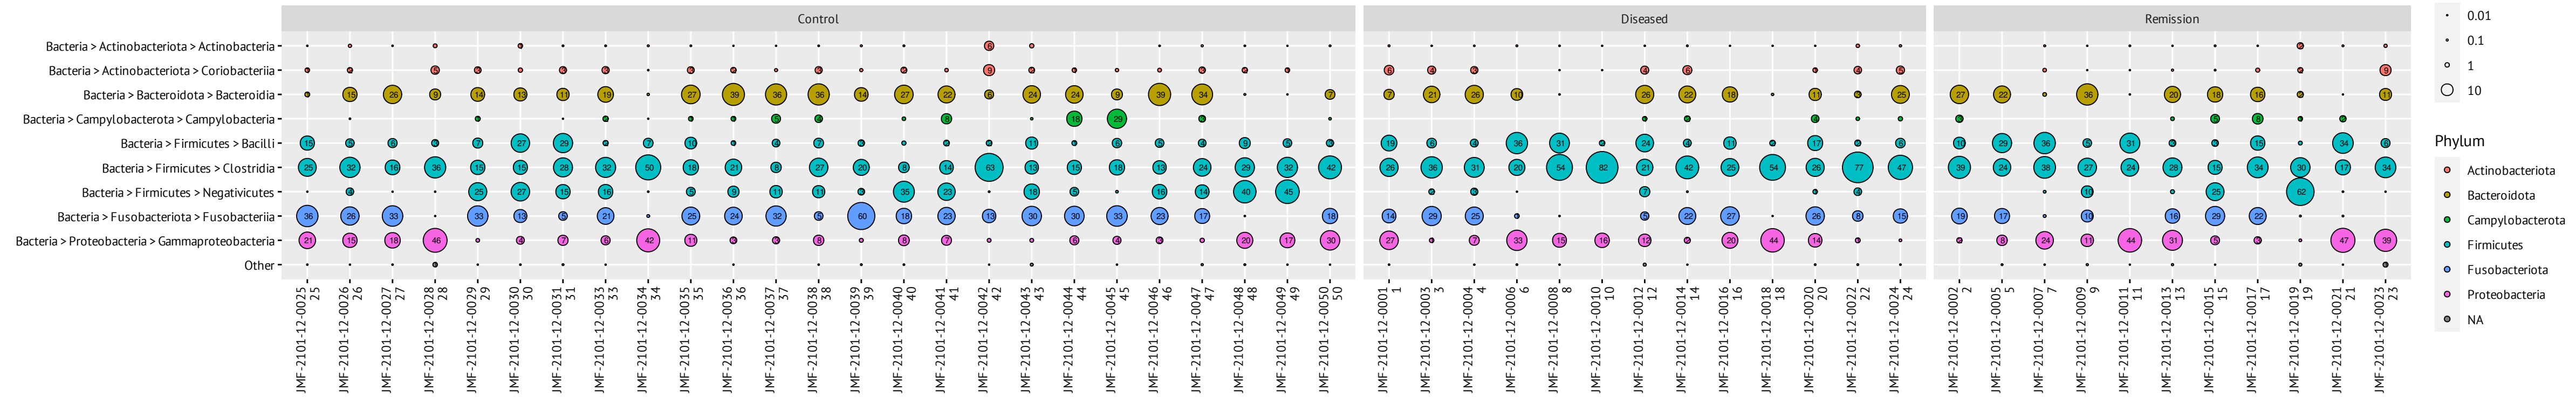

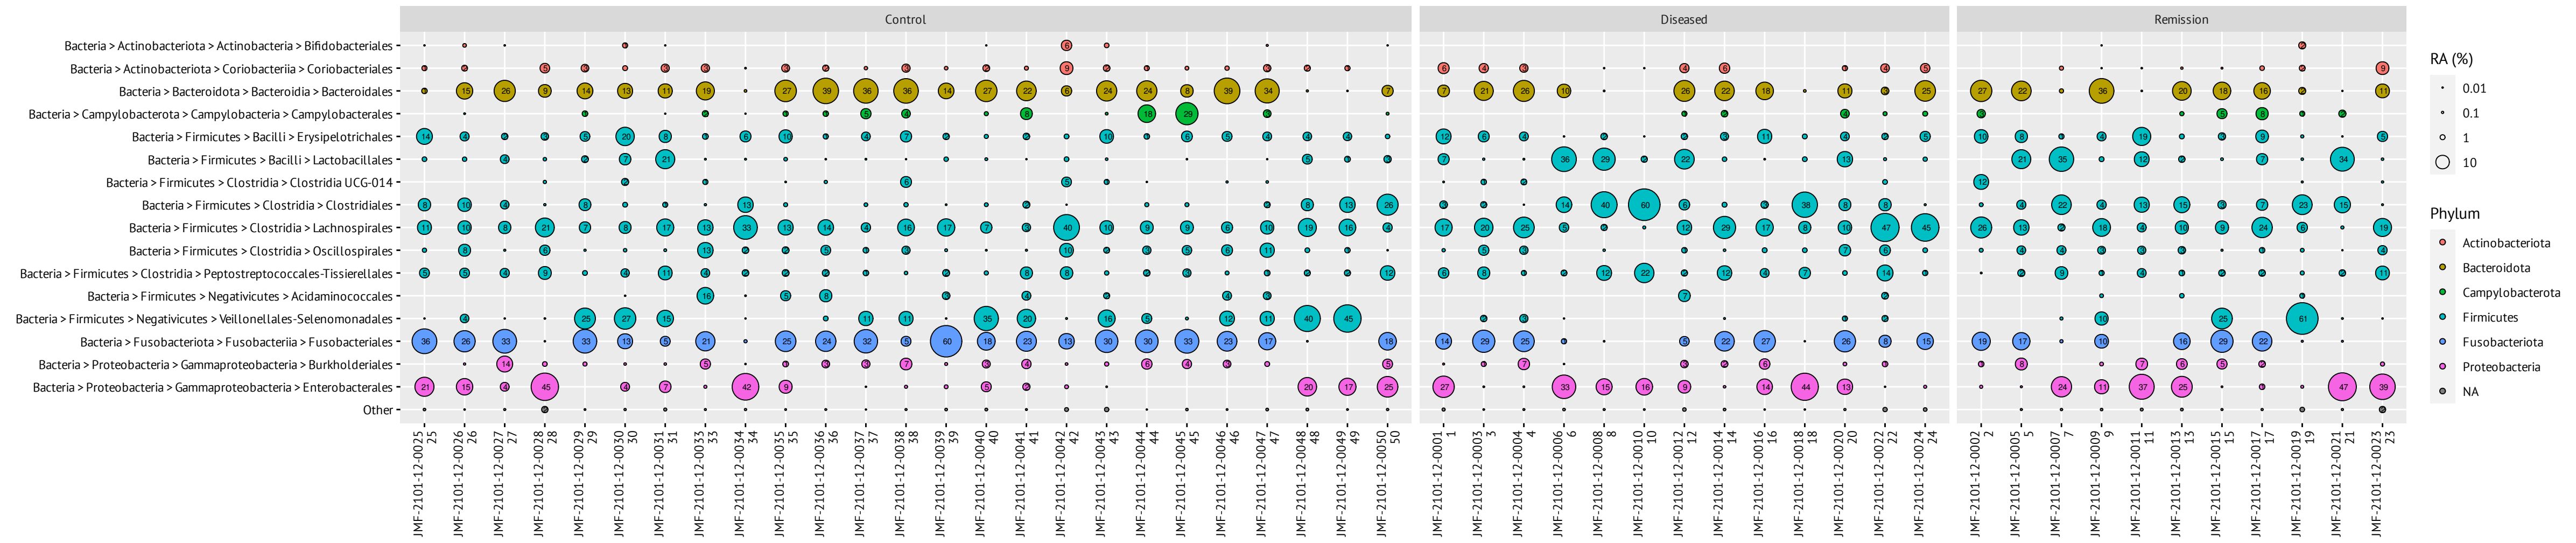

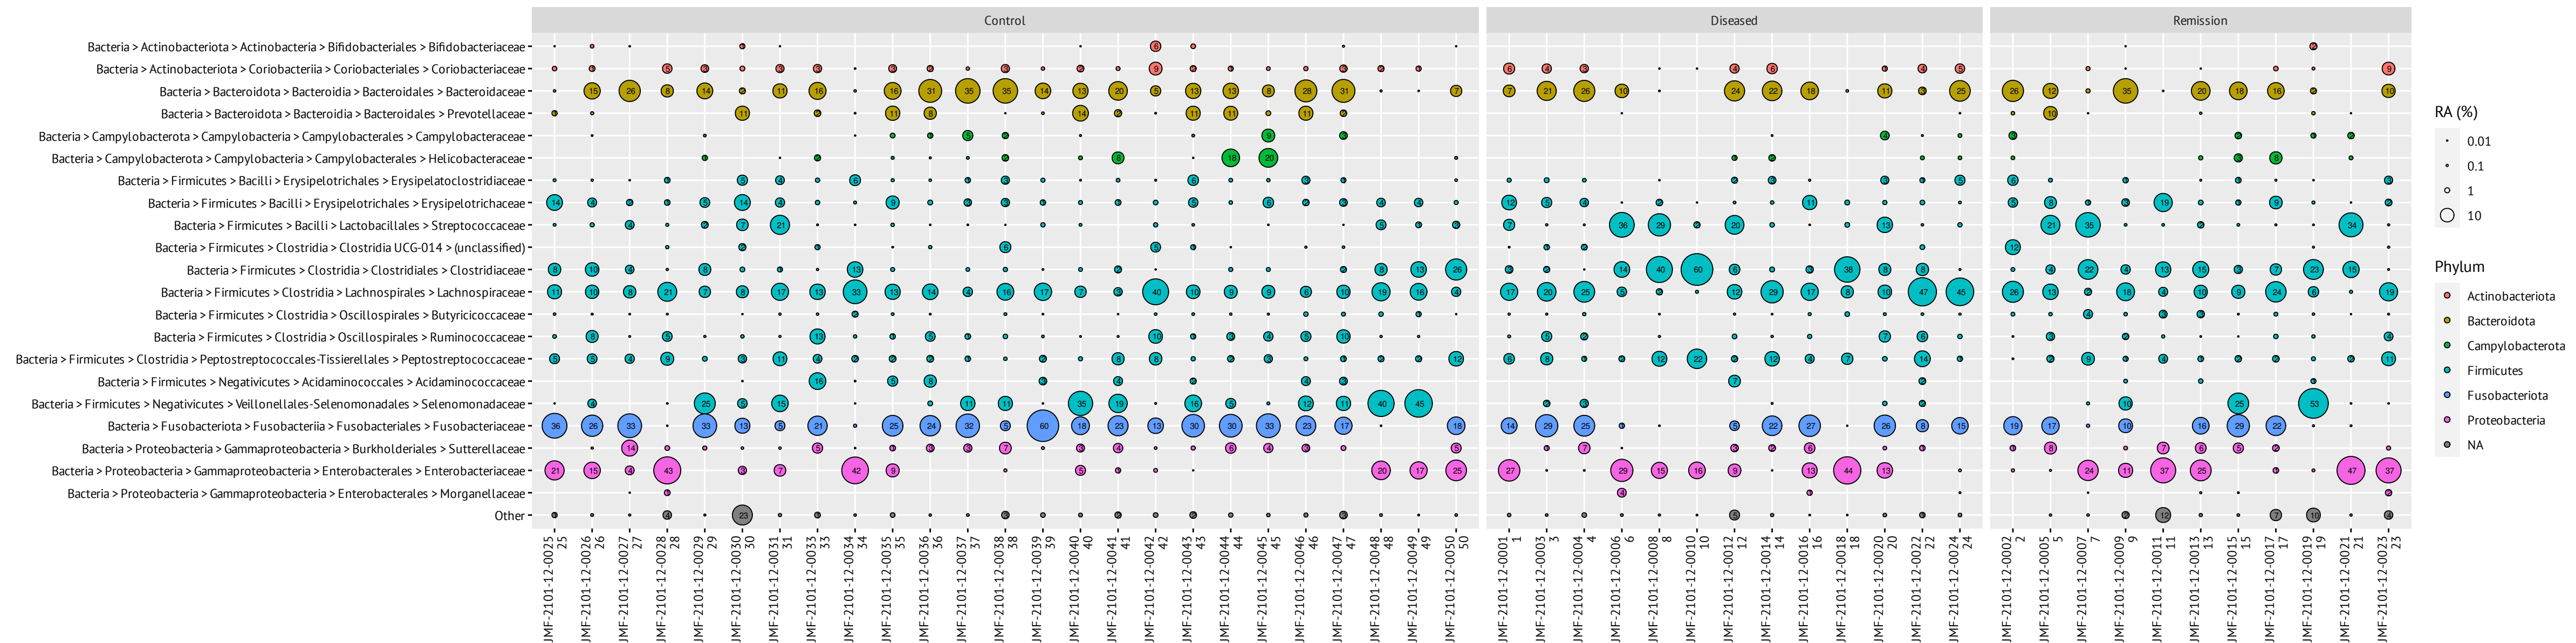

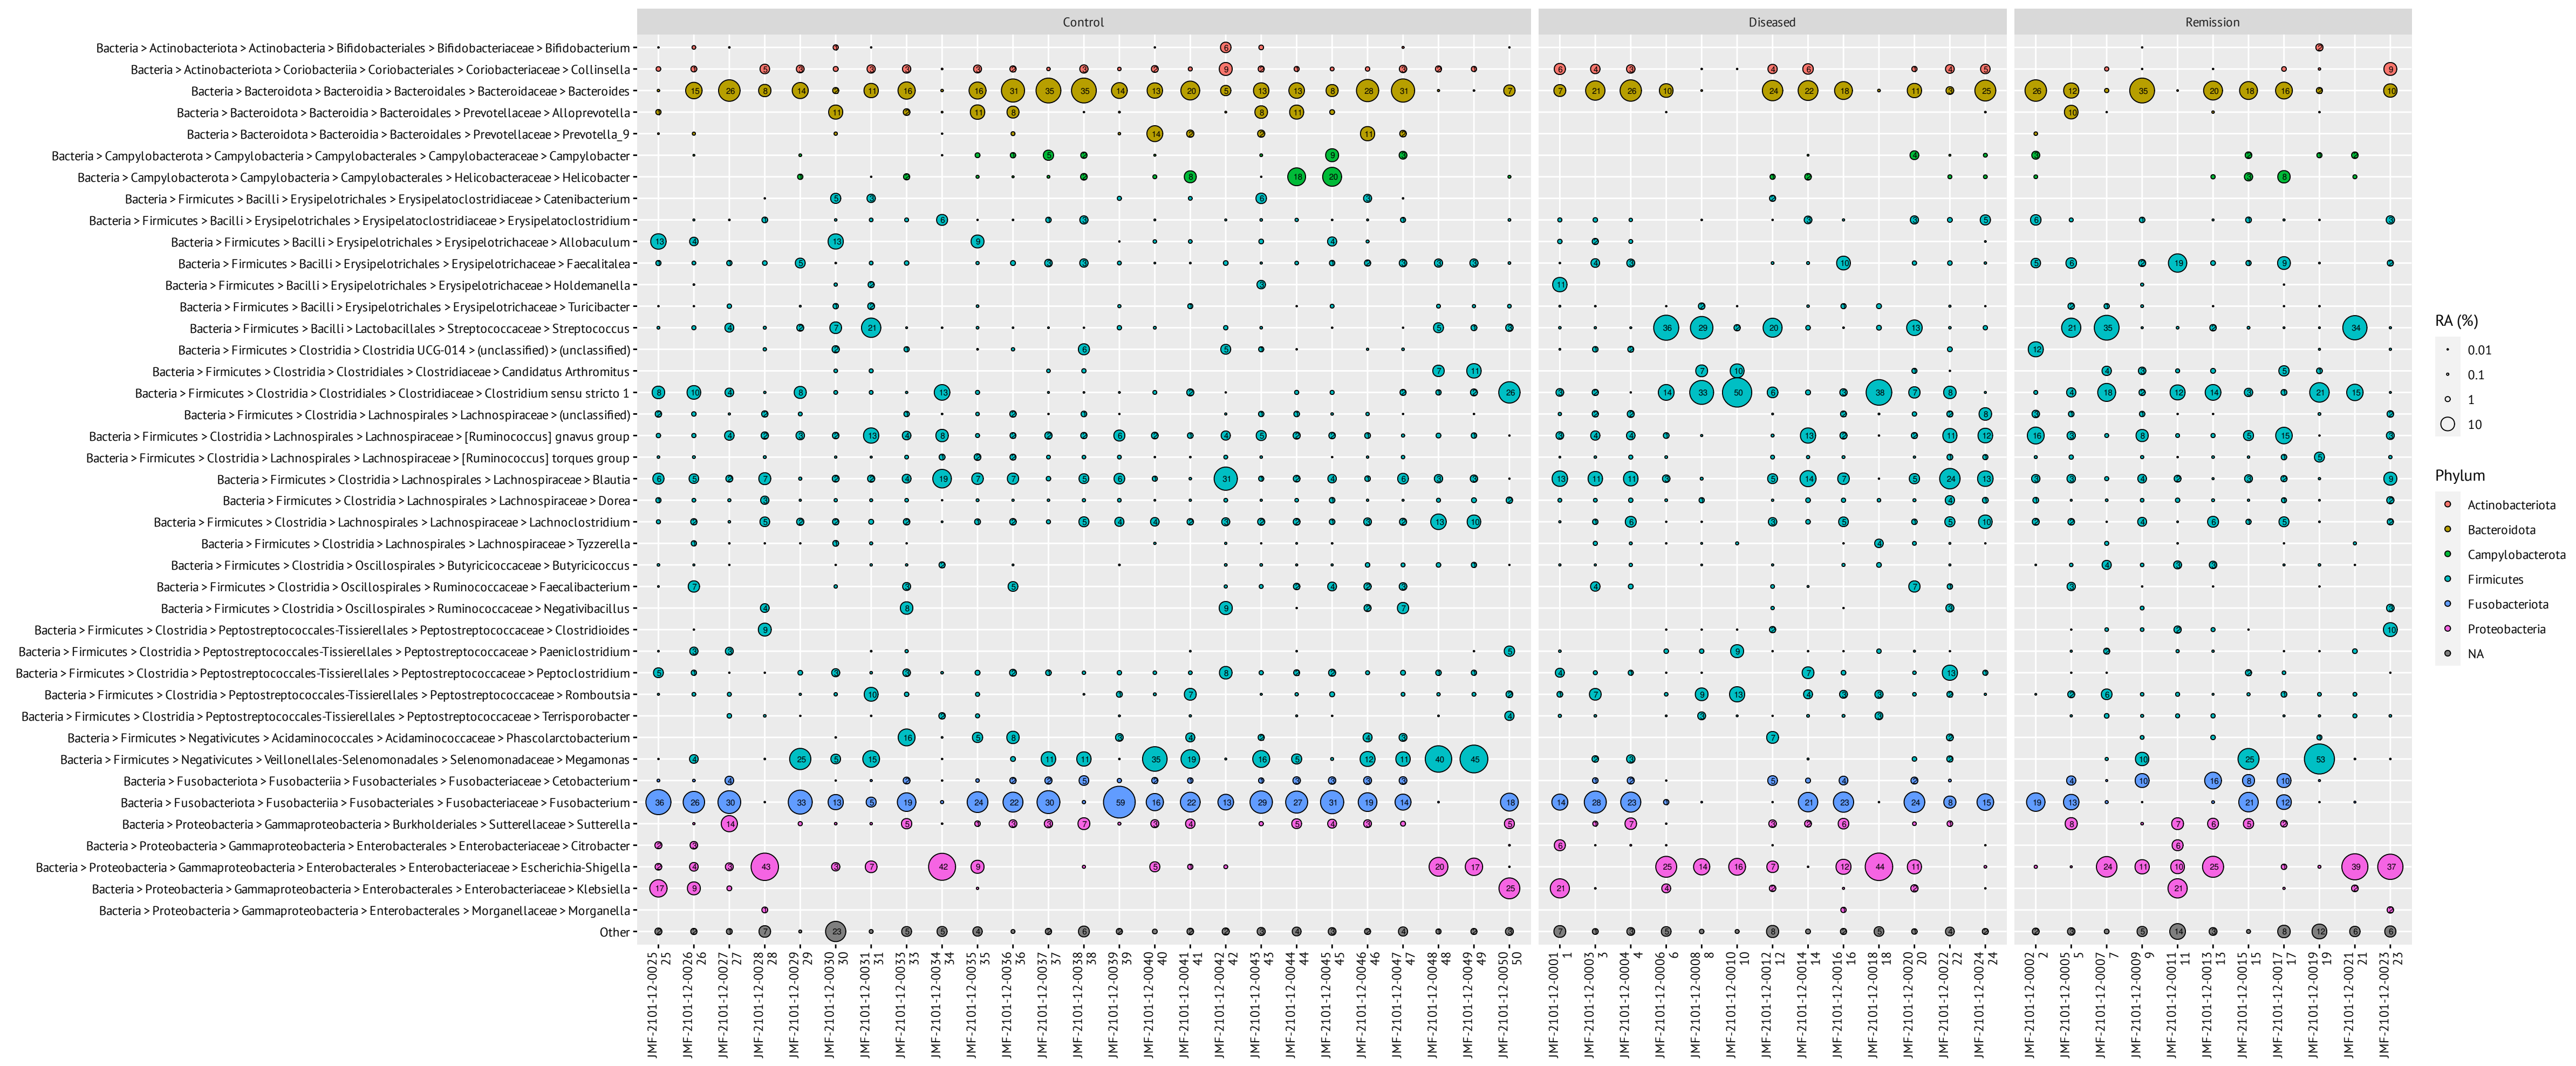

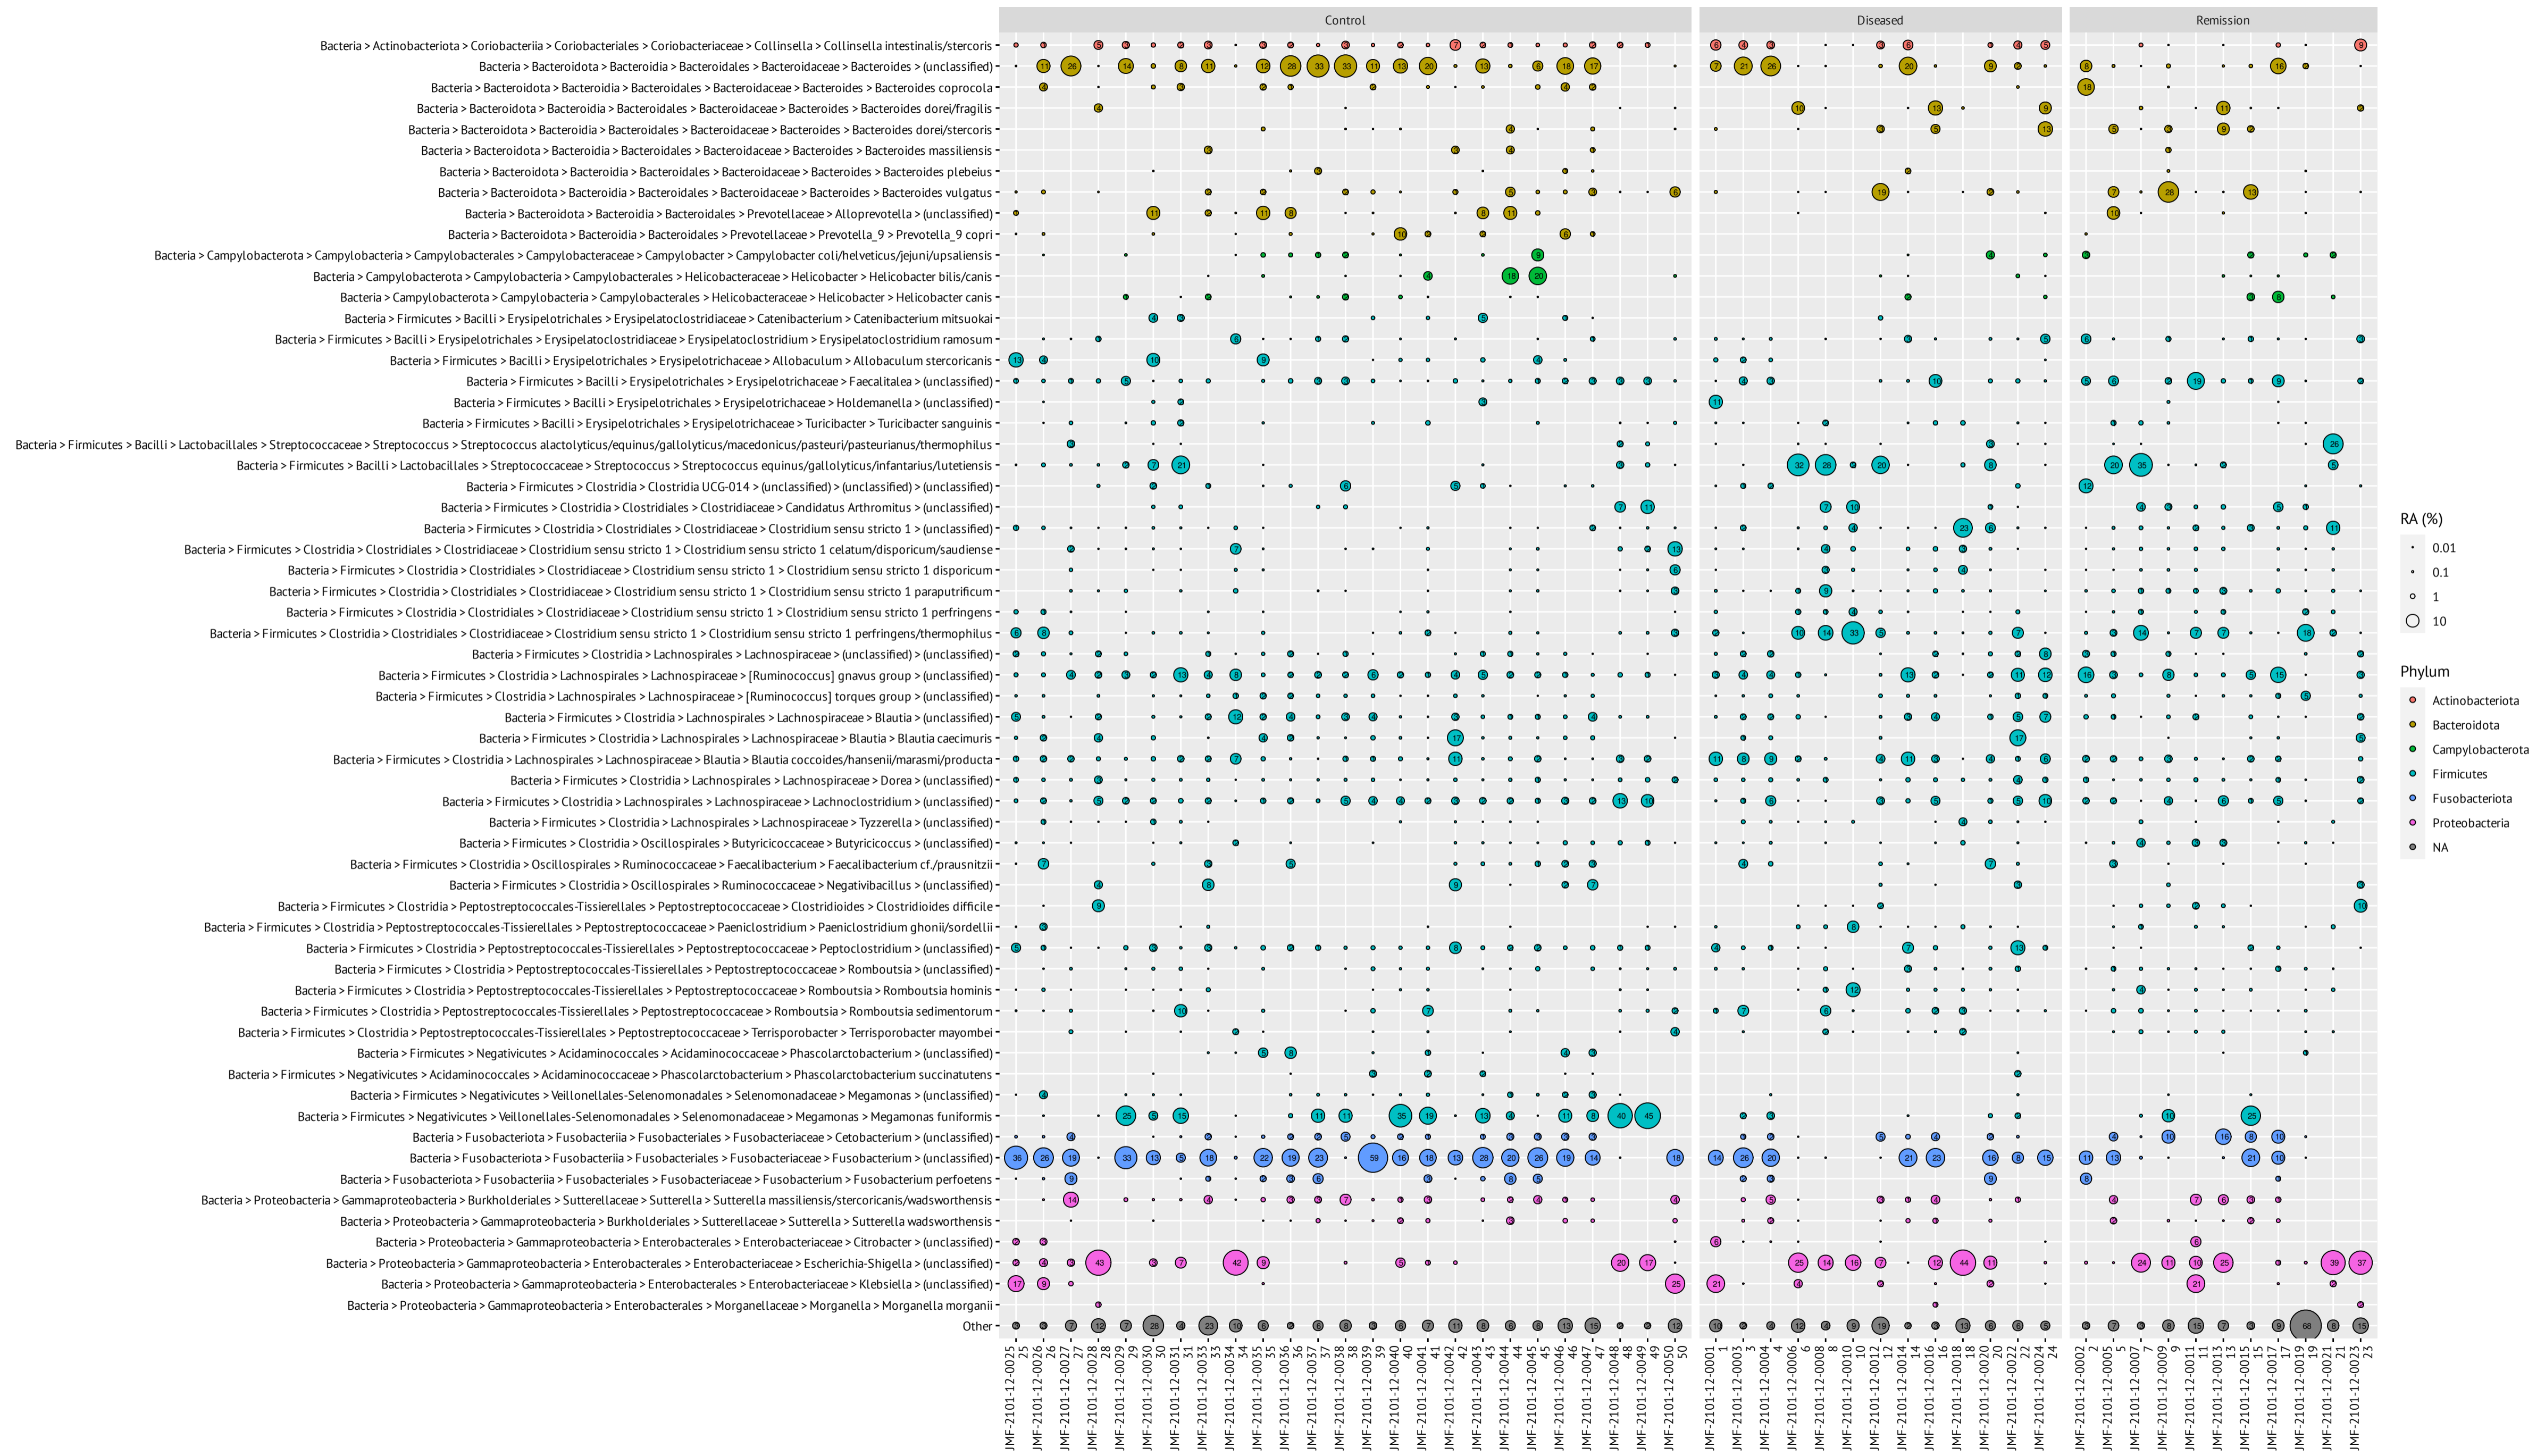



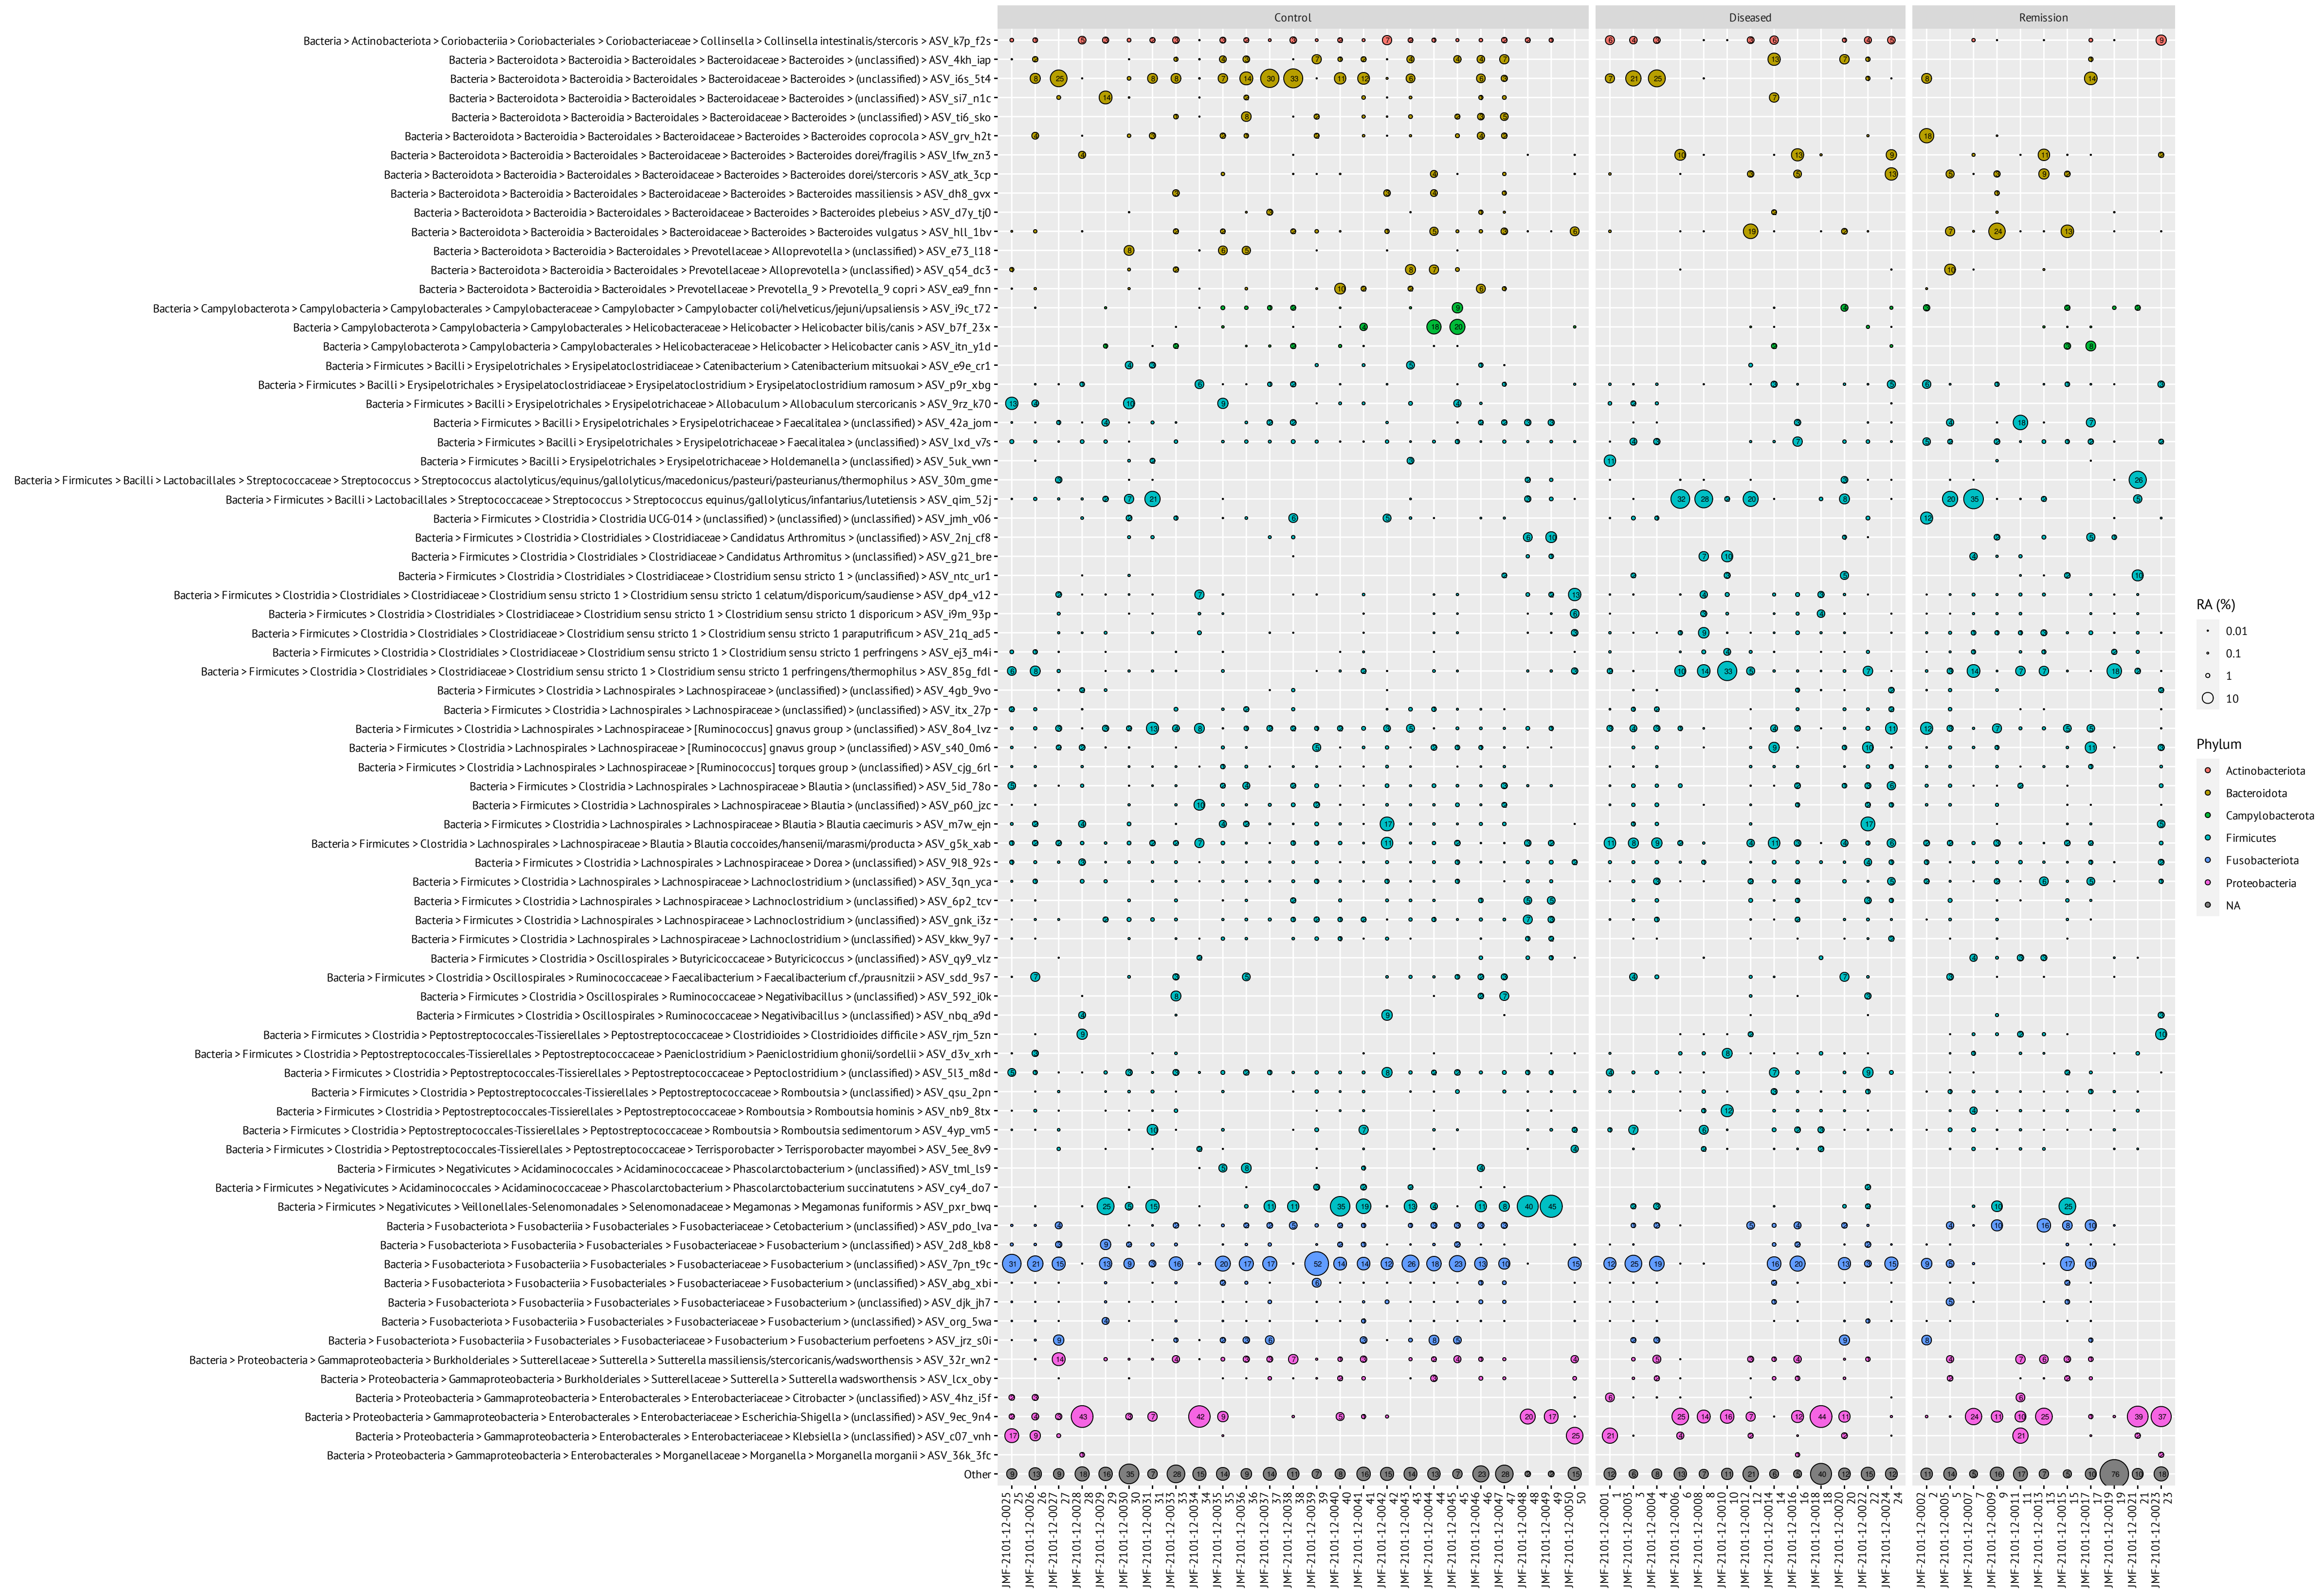

**RA (%)**

- 0.01
- 0.1
- 1
- 10

**Phylum**

- Actinobacteriota
- Bacteroidota
- Campylobacterota
- Firmicutes
- Fusobacteriota
- Proteobacteria
- NA
